# Supplementary material for: Combined targeting EGFR and SRC as a potential novel therapeutic approach for the treatment of triple negative breast cancer
Source: PubMed Central journal article supplement — Ther Adv Med Oncol. 2020 Jan 28;12:1758835919897546. doi: 10.1177/1758835919897546 (PMC6987485; doi:10.1177/1758835919897546), 2020-01-28
Supplement: Additional_File_1___Cell_line_authentication.pdf [file Additional_File_1___Cell_line_authentication.pdf]

Date: 21.07.15

Cell line: MDA-MB-231

| Marker  | Allele 1 | Allele 2 | STR profile |
|---------|----------|----------|-------------|
| D3S1358 | 16       | 16       | 16          |
| TH01    | 7        | 9.3      | 7,9.3       |
| D21S11  | 33.2     | 33.2     | 33.2        |
| D18S51  | 11       | 16       | 11,16       |
| Penta E | 11       | 11       | 11          |
| D5S818  | 12       | 12       | 12          |
| D13S317 | 13       | 13       | 13          |
| D7S820  | 8        | 9        | 8,9         |
| D16S539 | 12       | 12       | 12          |
| CSF1PO  | 12       | 13       | 12,13       |
| Penta D | 11       | 14       | 11,14       |
| AMEL    | X        | X        | X           |
| vWA     | 15       | 18       | 15,18       |
| D8S1179 | 13       | 13       | 13          |
| TPOX    | 8        | 9        | 8,9         |
| FGA     | 22       | 23       | 22,23       |

Date: 11.12.14

Cell line: HDQ-P1

| Marker  | Allele 1 | Allele 2 | STR profile |
|---------|----------|----------|-------------|
| D3S1358 | 15       | 15       | 15          |
| TH01    | 9.3      | 9.3      | 9.3         |
| D21S11  | 29       | 29       | 29          |
| D18S51  | 13       | 13       | 13          |
| Penta E | 11       | 13       | 11,13       |
| D5S818  | 11       | 11       | 11          |
| D13S317 | 12       | 12       | 12          |
| D7S820  | 11       | 12       | 11,12       |
| D16S539 | 11       | 11       | 11          |
| CSF1PO  | 11       | 11       | 11          |
| Penta D | 11       | 11       | 11          |
| AMEL    | X        | X        | X           |
| vWA     | 16       | 18       | 16,18       |
| D8S1179 | 12       | 15       | 15          |
| TPOX    | 8        | 8        | 8           |
| FGA     | 22       | 22       | 22          |

**Date: 11.12.14**  
**Cell line: HS578T(i8)**

| Marker  | Allele 1 | Allele 2 | STR profile |
|---------|----------|----------|-------------|
| D3S1358 | 16       | 17       | 16, 17      |
| TH01    | 9        | 9.3      | 9,9.3       |
| D21S11  | 29       | 32.2     | 29,32.2     |
| D18S51  | 16       | 16       | 16          |
| Penta E | 13       | 14       | 13,14       |
| D5S818  | 11       | 11       | 11          |
| D13S317 | 11       | 11       | 11          |
| D7S820  | 10       | 10       | 10          |
| D16S539 | 9        | 12       | 9,12        |
| CSF1PO  | 13       | 13       | 13          |
| Penta D | 8        | 13       | 8,13        |
| AMEL    | X        | X        | X           |
| vWA     | 17       | 17       | 17          |
| D8S1179 | 13       | 13       | 13          |
| TPOX    | 8        | 8        | 8           |
| FGA     | 23       | 24       | 23,24       |

**Date: 11.12.14**  
**Cell line: MDA-MB-468**

| Marker  | Allele 1 | Allele 2 | STR Profile |
|---------|----------|----------|-------------|
| D3S1358 | 15       | 15       | 15          |
| TH01    | 7        | 7        | 7           |
| D21S11  | 27       | 28       | 27,28       |
| D18S51  | 17       | 17       | 17          |
| Penta E | 5        | 5        | 5           |
| D5S818  | 12       | 12       | 12          |
| D13S317 | 12       | 12       | 12          |
| D7S820  | 8        | 8        | 8           |
| D16S539 | 9        | 9        | 9           |
| CSF1PO  | 12       | 12       | 12          |
| Penta D | 8        | 10       | 8,10        |
| AMEL    | X        | X        | X           |
| vWA     | 18       | 18       | 18          |
| D8S1179 | 13       | 13       | 13          |
| TPOX    | 8        | 9        | 8,9         |
| FGA     | 23       | 23       | 23          |

**Date: 12.07.16**  
**Cell line: CAL-85-1**

| Marker  | Allele 1 | Allele 2 | STR profile |
|---------|----------|----------|-------------|
| D3S1358 | 16       | 16       | 16          |
| TH01    | 6        | 6        | 6           |
| D21S11  | 30.2     | 32.2     | 30.2        |
| D18S51  | 14       | 14       | 14          |
| Penta E | 11       | 11       | 11          |
| D5S818  | 11       | 11       | 11          |
| D13S317 | 11       | 11       | 11          |
| D7S820  | 9        | 10       | 9,10        |
| D16S539 | 11       | 13       | 11,13       |
| CSF1PO  | 12       | 12       | 12          |
| Penta D | 9        | 9        | 9           |
| AMEL    | X        | X        | X           |
| vWA     | 18       | 18       | 18          |
| D8S1179 | 15       | 15       | 15          |
| FGA     | 24       | 24       | 24          |

**Date: 12.07.16**  
**Cell line: HCC70**

| Marker  | Allele 1 | Allele 2 | STR profile |
|---------|----------|----------|-------------|
| TPOX    | 9        | 10       | 9, 10       |
| D3S1358 | 16       | 17       | 16, 17      |
| Penta E | 9        | 16       | 9, 16       |
| D5S818  | 12       | 13       | 12,13       |
| D16S539 | 9        | 13       | 9,13        |
| CSF1PO  | 10       | 14       | 10,14       |
| vWA     | 13       | 15       | 13.15       |
| TPOX    | 9        | 10       | 9, 10       |
| FGA     | 19.2     | 24       | 19.2, 24    |
| TH01    | 9        | 9        | 9           |
| D21S11  | 30       | 30       | 30          |
| D18S51  | 13       | 16       | 13, 16      |
| D13S317 | 12       | 12       | 12          |
| D7S820  | 10       | 11       | 10,11       |
| Penta D | 10       | 10       | 10          |
| AMEL    | X        | X        | X           |
| D8S1179 | 13       | 13       | 13          |

**Date: 11-12-14**  
**Cell line: HCC1143**

| Marker  | Allele 1 | Allele 2 | STR profile |
|---------|----------|----------|-------------|
| D3S1358 | 16       | 16       | 16          |
| TH01    | 9.3      | 9.3      | 9.3         |
| D21S11  | 30.2     | 30.2     | 30.2        |
| D18S51  | 14       | 17       | 14          |
| Penta E | 10       | 10       | 10          |
| D5S818  | 11       | 11       | 11          |
| D13S317 | 12       | 12       | 12          |
| D7S820  | 12       | 12       | 12          |
| D16S539 | 11       | 13       | 11, 13      |
| CSF1PO  | 10       | 10       | 10          |
| Penta D | 8        | 8        | 8           |
| AMEL    | X        | X        | X           |
| vWA     | 16       | 16       | 16          |
| D8S1179 | 13       | 13       | 13          |
| FGA     | 21       | 21       | 21          |

**Date: 11-12-14**  
**Cell line: BT20**

| Marker  | Allele 1 | Allele 2 | STR profile |
|---------|----------|----------|-------------|
| D3S1358 | 17       | 17       | 17          |
| TH01    | 7        | 9.3      | 7, 9.3      |
| D21S11  | 28       | 29       | 28, 29      |
| D18S51  | 17       | 17       | 17          |
| Penta E | 11       | 13       | 11, 13      |
| D5S818  | 12       | 12       | 12          |
| D13S317 | 11       | 11       | 11          |
| D7S820  | 10       | 10       | 10          |
| D16S539 | 11       | 14       | 11, 14      |
| CSF1PO  | 12       | 12       | 12          |
| Penta D | 10       | 11       | 10, 11      |
| AMEL    | X        | X        | X           |
| vWA     | 16       | 17       | 16, 17      |
| D8S1179 | 12       | 12       | 12          |
| FGA     | 22       | 24       | 22, 24      |

**Date: 11-12-14**  
**Cell line: HCC1937**

| Marker  | Allele 1 | Allele 2 | STR profile |
|---------|----------|----------|-------------|
| D3S1358 | 18       | 18       | 18          |
| TH01    | 6        | 6        | 6           |
| D21S11  | 28       | 28       | 28          |
| D18S51  | 12       | 12       | 12          |
| Penta E | 13       | 13       | 13          |
| D5S818  | 12       | 12       | 12          |
| D13S317 | 13       | 13       | 13          |
| D7S820  | 9        | 10       | 9, 10       |
| D16S539 | 13       | 14       | 13, 14      |
| CSF1PO  | 12       | 12       | 12          |
| Penta D | 9        | 9        | 9           |
| AMEL    | X        | X        | X           |
| vWA     | 16       | 17       | 16, 17      |
| D8S1179 | 12       | 13       | 12, 13      |
| FGA     | 20       | 22       | 20, 22      |

**Date:**  
**Cell line: CAL-51**

| Marker  | Allele 1 | Allele 2 | STR profile |
|---------|----------|----------|-------------|
| D3S1358 | 16       | 17       | 16,17       |
| TH01    | 7        | 7        | 7           |
| D21S11  | 31       | 32       | 31,32       |
| D18S51  | 15       | 17       | 15,17       |
| Penta E | 7        | 12       | 7,12        |
| D5S818  | 12       | 13       | 12,13       |
| D13S317 | 11       | 13       | 11,13       |
| D7S820  | 7        | 12       | 7,12        |
| D16S539 | 11       | 13       | 11,13       |
| CSF1PO  | 11       | 12       | 11,12       |
| Penta D | 10       | 14       | 10,14       |
| AMEL    | X        | X        | X           |
| vWA     | 18       | 18       | 118         |
| D8S1179 | 14       | 14       | 14          |
| TPOX    | 8        | 9        | 8,9         |
| FGA     | 22       | 23       | 22,23       |

Date: 21.07.15

Cell line: HCC1187

| Marker  | Allele 1 | Allele 2 | STR profile |
|---------|----------|----------|-------------|
| D3S1358 | 15       | 15       | 15          |
| TH01    | 6        | 6        | 6           |
| D21S11  | 29       | 30       | 29,30       |
| D18S51  | 17       | 17       | 17          |
| Penta E | 16       | 16       | 16          |
| D5S818  | 12       | 12       | 12          |
| D13S317 | 11       | 11       | 11          |
| D7S820  | 8        | 11       | 8,11        |
| D16S539 | 10       | 10       | 10          |
| CSF1PO  | 13       | 13       | 13          |
| Penta D | 11       | 11       | 11          |
| AMEL    | X        | X        | X           |
| vWA     | 19       | 19       | 19          |
| D8S1179 | 11       | 11       | 11          |
| TPOX    | 8        | 8        | 8           |
| FGA     | 23       | 23       | 23          |

Date: 21.07.15

Cell line: MDA-MB-157

| Marker  | Allele 1 | Allele 2 | STR profile |
|---------|----------|----------|-------------|
| D3S1358 | 16       | 16       | 16          |
| TH01    | 7        | 8        | 7,8         |
| D21S11  | 31       | 31.2     | 31,31.2     |
| D18S51  | 16       | 16       | 16          |
| Penta E | 11       | 11       | 11          |
| D5S818  | 12       | 12       | 12          |
| D13S317 | 11       | 12       | 11,12       |
| D7S820  | 10       | 11       | 10,11       |
| D16S539 | 11       | 11       | 11          |
| CSF1PO  | 10       | 10       | 10          |
| Penta D | 3.2      | 9        | 3.2,9       |
| AMEL    | X        | X        | X           |
| vWA     | 15       | 15       | 15          |
| D8S1179 | 12       | 14       | 12,14       |
| TPOX    | 9        | 11       | 9,11        |
| FGA     | 23       | 23       | 23          |

Date: 13.07.16

Cell line: CAL-120

| Marker  | Allele 1 | Allele 2 | STR profile |
|---------|----------|----------|-------------|
| D3S1358 | 18       | 18       | 18          |
| TH01    | 6        | 6        | 6           |
| D21S11  | 30       | 30       | 30          |
| D18S51  | 12       | 12       | 12          |
| Penta E | 11       | 11       | 11          |
| D5S818  | 13       | 13       | 13          |
| D13S317 | 12       | 12       | 12          |
| D7S820  | 12       | 12       | 12          |
| D16S539 | 12       | 12       | 12          |
| CSF1PO  | 12       | 12       | 12          |
| Penta D | 13       | 13       | 13          |
| AMEL    | X        | X        | X           |
| vWA     | 18       | 18       | 18          |
| D8S1179 | 12       | 13       | 12,13       |
| TPOX    | 8        | 9        | 8,9         |
| FGA     | 21       | 21       | 21          |

Date: 13.07.16

Cell line: HCC1806

| Marker  | Allele 1 | Allele 2 | STR profile |
|---------|----------|----------|-------------|
| D3S1358 | 16       | 16       | 16          |
| TH01    | 8        | 8        | 8           |
| D21S11  | 29       | 29       | 29          |
| D18S51  | 16       | 16       | 16          |
| Penta E | 12       | 12       | 12          |
| D5S818  | 13       | 13       | 13          |
| D13S317 | 11       | 11       | 11          |
| D7S820  | 10       | 12       | 10,12       |
| D16S539 | 10       | 10       | 10          |
| CSF1PO  | 12       | 12       | 12          |
| Penta D | 15       | 15       | 15          |
| AMEL    | X        | X        | X           |
| vWA     | 16       | 18       | 16,18       |
| D8S1179 | 14       | 15       | 14,15       |
| TPOX    | 8        | 9        | 8,9         |
| FGA     | 25       | 25       | 25          |
